# Supplementary material
Source: Springer Nature journal article supplement (https://www.springermedizin.de/resource/supplementary/12889_2013_6776_MOESM1_ESM.pdf/9499034)

**Occupational  
maximum limits**

**% HRR**

**RPE**

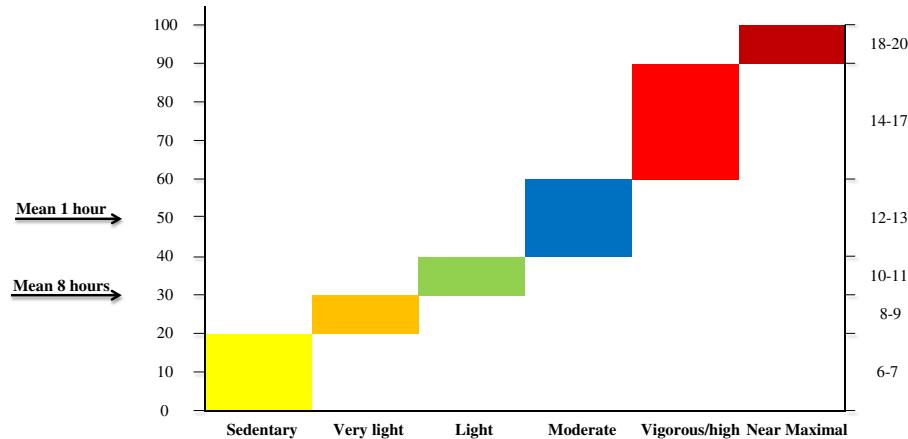

Supplement: MOESM1 [file 9499034]
